# Supplementary material for: Potential Therapeutic Role of Bone Morphogenic Protein 7 (BMP7) in the Pathogenesis of Graves’ Orbitopathy
Source: PubMed Central journal article supplement — Invest Ophthalmol Vis Sci. 2022 Jun 7;63(6):7. doi: 10.1167/iovs.63.6.7 (PMC9187939; doi:10.1167/iovs.63.6.7), 2022-06-07
Supplement: iovs-63-6-7_s001.pdf [file iovs-63-6-7_s001.pdf]

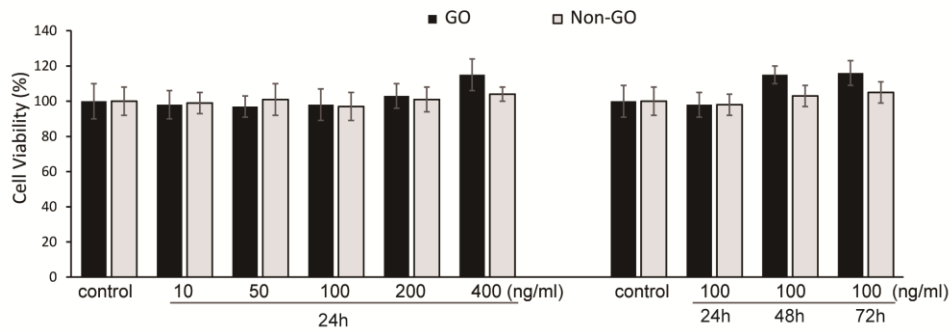

**Supplementary Figure S1.** Effect of rhBMP7 on the viability of orbital fibroblasts, measured using MTT assay. Experiments were performed three times using different strains, and samples were assayed in duplicate. Cell viability remained above 95% in both GO and non-GO orbital fibroblasts treated with 10 – 400 ng/ml of rhBMP7 for 24 hours and with 100ng/ml of rhBMP7 for 24 – 72 hours. The results are presented as mean  $\pm$  SDs.
