# Supplementary material for: Potential Therapeutic Role of Bone Morphogenic Protein 7 (BMP7) in the Pathogenesis of Graves’ Orbitopathy
Source: PubMed Central journal article supplement — Invest Ophthalmol Vis Sci. 2022 Jun 7;63(6):7. doi: 10.1167/iovs.63.6.7 (PMC9187939; doi:10.1167/iovs.63.6.7), 2022-06-07
Supplement: iovs-63-6-7_s002.pdf [file iovs-63-6-7_s002.pdf]

**Supplementary Table S1. List of reagents**

| Antibody*           | Manufacturer              | Catalogue Number | Isotype               |
|---------------------|---------------------------|------------------|-----------------------|
| BMP7                | Santa Cruz Biotechnology  | sc-53917         | Mouse monoclonal IgG1 |
| $\beta$ -actin      | Santa Cruz Biotechnology  | sc-8432          | Mouse monoclonal IgG1 |
| Fibronectin         | BD                        | 610077           | Mouse monoclonal IgG1 |
| Collagen I $\alpha$ | Abcam                     | Ab138492         | Rabbit monoclonal IgG |
| $\alpha$ -SMA       | Sigma-Aldrich             | A5228            | Mouse monoclonal IgG1 |
| p-SMAD1/5/8         | Cell Signaling Technology | 13820            | Rabbit monoclonal IgG |
| t-SMAD1/5/8         | Cell Signaling Technology | 9743             | Rabbit polyclonal IgG |
| p-SMAD2             | Cell Signaling Technology | 3108             | Rabbit monoclonal IgG |
| t-SMAD2             | Cell Signaling Technology | 5339             | Rabbit monoclonal IgG |
| p-SMAD3             | Cell Signaling Technology | 9520             | Rabbit monoclonal IgG |
| t-SMAD3             | Cell Signaling Technology | 8028             | Rabbit monoclonal IgG |
| p-ERK               | Cell Signaling Technology | 9101             | Rabbit polyclonal IgG |
| t-ERK,              | Cell Signaling Technology | 9102             | Rabbit polyclonal IgG |
| p-p38               | Cell Signaling Technology | 9211             | Rabbit polyclonal IgG |
| t-p38               | Cell Signaling Technology | 9212             | Rabbit polyclonal IgG |
| TRAF6               | Cell Signaling Technology | 8028             | Rabbit monoclonal IgG |
| IL-6                | Novus Biologicals         | NB600-1131       | Rabbit polyclonal IgG |
| IL-8                | Abcam                     | Ab7747           | Rabbit polyclonal IgG |
| ICAM-1              | Cell Signaling Technology | 4915             | Rabbit polyclonal IgG |
| p-NF $\kappa$ B     | Cell Signaling Technology | 3031             | Rabbit monoclonal IgG |
| t-NF $\kappa$ B     | Cell Signaling Technology | 4164             | Rabbit monoclonal IgG |
| p-Akt               | Cell Signaling Technology | 9271             | Rabbit polyclonal IgG |
| t-Akt               | Cell Signaling Technology | 9272             | Rabbit polyclonal IgG |
| p-Jnk               | Cell Signaling Technology | 9251             | Rabbit polyclonal IgG |
| t-Jnk               | Cell Signaling Technology | 9252             | Rabbit polyclonal IgG |

Abbreviations: BMP7, bone morphogenic protein 7;  $\alpha$ -SMA,  $\alpha$  smooth muscle actin; p, phosphorylated; t, total; ERK, extracellular signal-regulated kinase; TRAF6; TNF receptor associated factor 6; IL, Interleukin; ICAM-1, intercellular adhesion molecule 1; NF $\kappa$ B, nuclear factor kappa-light-chain-enhancer of activated B; Jnk, c-Jun NH(2)-terminal kinase

\* The antibodies are listed in the order of appearance.

**Supplementary Table S2.** Clinical information of patient samples used in the present in vitro study

| Age (years)                    | Sex | CAS | Duration Of GO (years) | Proptosis R/L (mm) | Surgery performed    |
|--------------------------------|-----|-----|------------------------|--------------------|----------------------|
| <b>GO patients</b>             |     |     |                        |                    |                      |
| 31                             | F   | 3/7 | 5                      | 28/26.5            | Decompression        |
| 45                             | F   | 0/7 | 3                      | 26/26              | Decompression        |
| 48                             | F   | 2/7 | 2                      | 20/20              | Decompression        |
| 57                             | F   | 4/7 | 1                      | 17/16              | Decompression        |
| 65                             | F   | 4/7 | 2                      | 23/23              | Decompression        |
| 72                             | F   | 0/7 | 1                      | 19/19              | Decompression        |
| 23                             | M   | 3/7 | 1                      | 24.5/25            | Decompression        |
| 36                             | M   | 0/7 | 3                      | 25/26              | Decompression        |
| 42                             | M   | 0/7 | 10                     | 23/22              | Decompression        |
| 45                             | M   | 5/7 | 1                      | 16/15              | Decompression        |
| 56                             | M   | 2/7 | 13                     | 22/22              | Decompression        |
| 63                             | M   | 2/7 | 1                      | 20/24              | Decompression        |
| <b>Non-GO control subjects</b> |     |     |                        |                    |                      |
| 59                             | F   | n/a | n/a                    | n/a                | Blepharoplasty UL OU |
| 61                             | F   | n/a | n/a                    | n/a                | Blepharoplasty UL OU |
| 65                             | F   | n/a | n/a                    | n/a                | Blepharoplasty UL OU |
| 74                             | F   | n/a | n/a                    | n/a                | Blepharoplasty LL OU |
| 76                             | F   | n/a | n/a                    | n/a                | Blepharoplasty UL OU |
| 78                             | F   | n/a | n/a                    | n/a                | Blepharoplasty UL OU |
| 35                             | F   | n/a | n/a                    | n/a                | Blepharoplasty UL OU |
| 58                             | M   | n/a | n/a                    | n/a                | Blepharoplasty UL OU |
| 60                             | M   | n/a | n/a                    | n/a                | Blepharoplasty LL OU |
| 45                             | M   | n/a | n/a                    | n/a                | Blepharoplasty UL OU |
| 63                             | M   | n/a | n/a                    | n/a                | Blepharoplasty LL OU |
| 44                             | M   | n/a | n/a                    | n/a                | Blepharoplasty LL OU |

Abbreviation: CAS, clinical activity scores; GO, Graves' orbitopathy; R, right eye; L, left eye; F, female; M, male; n/a, not applicable

**Supplementary Table S3. Literature review of targeting BMP7 signaling in various organs**

| <b>Organ</b>                | <b>Reference</b>                    | <b>Treatment</b>                 | <b>Subject</b> | <b>Administration</b>                         | <b>Outcome</b>                                                                               |
|-----------------------------|-------------------------------------|----------------------------------|----------------|-----------------------------------------------|----------------------------------------------------------------------------------------------|
| <b>Bone</b>                 | Zhang et al, 2007 <sup>22</sup>     | rhBMP7                           | Dogs           | Viral vector chitosan/collagen implant        | Increased bone formation of mandibular defect                                                |
|                             | Hunter et al., 2010 <sup>49</sup>   | rhBMP7                           | Human          | Intra-articular injection into the knee joint | Limited toxicity in symptomatic knee osteoarthritis                                          |
| <b>Brown adipose tissue</b> | Boon et al., 2012 <sup>50</sup>     | BMP7                             | Mouse          | Subcutaneous osmotic minipump implant         | Increased brown adipose fat volume at subthermoneutral temperature                           |
| <b>Kidney</b>               | Sugimoto et al., 2012 <sup>51</sup> | AA123 (activator (BMP7 mimetic)) | Mouse          | Intravenous injection via the tail vein       | Antifibrotic effects in a mouse model of kidney disease                                      |
| <b>Heart</b>                | Urbina et al, 2017 <sup>52</sup>    | BMP7                             | Mouse          | Intravenous injection                         | Reducing adverse cardiac remodeling in the pericardiac diabetic cardiomyopathy               |
|                             | Merino et al, 2016 <sup>28</sup>    | rhBMP7                           | Mouse          | Subcutaneous osmotic minipump implant         | Suppressing left ventricular remodeling                                                      |
| <b>Liver</b>                | Chen et al., 2012 <sup>44</sup>     | rhBMP7                           | Mouse          | Intraperitoneal injection                     | Reducing hepato-schistosomiasis-associated fibrosis via antagonism of TGF- $\beta$ signaling |

Abbreviation: BMP7, bone morphogenic protein 7; rhBMP7, recombinant bone morphogenic protein 7; TGF- $\beta$ , transforming growth factor- $\beta$
